# Supplementary material
Source: publisher site journal article supplement (https://www.dovepress.com/article/398811)
Supplement: Supplementary file 1 [file get_supplementary_file.php]

**Supplementary data 1: Key informant interview guide**

1. How important do you see it to have a National Pharmacovigilance Center in Eritrea?
2. How do you rate the **integration** level of Pharmacovigilance to your specific program and the Eritrean healthcare system in general?

- Is the relationship mutual, i.e. is there any collaboration between your program and the Pharmacovigilance center?
- How does the strategic plan of each program align?
- What would you suggest for an enhanced level of integration?
- What do you think are the facilitators and barriers to effective integration?

1. How do you see the **impact** of the Pharmacovigilance Center in your program in particular and in the Eritrean healthcare system in general?

- Has there been any tangible outcomes or practical impacts to report at this time pertaining specifically to your program?
- What changes have come about in the general healthcare system since the establishment of Pharmacovigilance?

1. What do you think are the major **facilitators** and **limiting factors** for the success of the pharmacovigilance program in Eritrea?
   - What do you think is the secret to the success of the program?
   - Is there any limitation that you have noted in the established Pharmacovigilance program?
   - Can you see any areas of improvement?
2. What can you say regarding your **expectations** from the National Pharmacovigilance Center as compared to the status the center is currently in?
3. Your overall impression of the PV program and the way it is organized and your recommendations for further improvement? Any further comments, suggestions or recommendations?

**Supplementary data 2: Consolidated criteria for reporting qualitative studies (COREQ) checklist**

| Domain 1: Research team and reflexivity | | | | |
| --- | --- | --- | --- | --- |
| Personal Characteristics | | | Page no. | Line no. |
|  | Interviewer/facilitator | All the authors (NAA, ST, and MT) conducted the face-to-face and telephone interviews. | 6/22 | 134-135 |
|  | Credentials | All the researchers had a bachelor’s degree in Pharmacy | - | - |
|  | Occupation | All the researchers were regulatory officers at the time of the study | - | - |
|  | Gender | There were two male and one female researchers | - |  |
|  | Experience and training | The researchers had experience in doing qualitative researches such as conducting focus group discussions. | 6/22 | 134 |
| Relationship with participants | | | | |
|  | Relationship established | No relationship was established with the participants prior to the commencement of the study | 6/22 | 130-132 |
|  | Participant knowledge of the interviewer | The participants were aware of the researchers’ goals and reasons for doing the research | 6/22 | 135-136 |
|  | Interviewer characteristics | There was no bias or conflicts of interests when conducting the research. | 18/22 | 466 |
| Domain 2: study design | | | | |
| Theoretical framework | | | | |
|  | Methodological orientation and Theory | Exploratory qualitative study was used. | 4/22 | 103 |
| Participant selection | | | | |
|  | Sampling | Purposive sampling was used to recruit the participants of the study | 5/22 | 119 |
|  | Method of approach | Face-to-face and telephone interviews were conducted | 4/22 | 103 |
|  | Sample size | The study involved eleven (11) participants | 5/22 | 123 |
|  | Non-participation | No one refused to participate in the study and there were no dropouts from the research | 6/22 | 132-133 |
| Setting | | | | |
|  | Setting of data collection | The data was collected at the participants workplaces | 4/22 | 105 |
|  | Presence of non-participants | There was no one else present besides the participants and the researchers | 4/22 | 105-106 |
|  | Description of sample | The participants selected were key informants form the major stakeholders of the EPC | 5/22 | 111-117 |
| Data collection | | | | |
|  | Interview guide | The author developed an interview guide based on discussions. | 5/22 | 125 |
|  | Repeat interviews | No repeat interviews were carried out | 6/22 | 142-143 |
|  | Audio/visual recording | All the interviews were audio recorded | 6/22 | 142 |
|  | Field notes | Field notes were taken during the interviews | 6/22 | 142 |
|  | Duration | The face-to-face interviews lasted an average of 24 minutes (range 16-33 mins). The telephone interviews lasted an average of 32 minutes. | 6/22 | 137-140 |
|  | Data saturation | Data saturation was reached after selecting 11 participants | 5/22 | 123 |
|  | Transcripts returned | Each participant in the study was sent their own transcript and quotes for verification and approval | 7/22 | 168 |
| Domain 3: analysis and findings | | | | |
| Data analysis | | | | |
|  | Number of data coders | All the researchers coded the data | 7/22 | 154-156 |
|  | Description of the coding tree | Description of the coding tree has been provided | Figure 1 | - |
|  | Derivation of themes | The themes were derived from the data and the research questions | 7/22 | 162-163 |
|  | Software | No software was use to manage the data | 7/22 | 156-157 |
|  | Participant checking | The participants provided feedback on the findings | 7/22 | 168 |
| Reporting | | | | |
|  | Quotations presented | Quotations from the participants were used to illustrate the themes generated in the study. Each quotation was identified by using the key informant identifier code | 8/22 | 196-199 |
|  | Data and findings consistent | The data captured and the results were consistent | 7-13/22 | 180-332160-313 |
|  | Clarity of major themes | The major themes were clearly presented in the findings | 7-13/22 | 180-332 |
|  | Clarity of minor themes | There was description of diverse cases and discussion of minor themes. | 7-13/22 | 180-332 |
